# Supplementary material for: Virulence of Shigatoxigenic and Enteropathogenic Escherichia coli O80:H2 in Galleria mellonella Larvae: Comparison of the Roles of the pS88 Plasmids and STX2d Phage
Source: MDPI journal article supplement (doi:10.3390/vetsci10070420), 2023-06-29
Supplement: s1 [file s1]

**Table S1.** Log-rank analysis results of the lethality rates of all *E. coli* O80 and non-O80 strains tested in *G. mellonella* larvae according to the inoculated concentration (log1 to log6 CFU) vs the PBS injected larvae.

|                                                            | Concentration (CFU) | Log1 | Log2 | Log3 | Log4 | Log5 | Log6 |
|------------------------------------------------------------|---------------------|------|------|------|------|------|------|
| <b>Strains</b>                                             |                     |      |      |      |      |      |      |
| Laboratory K12 DH5 $\alpha$                                |                     |      |      |      |      |      |      |
| Serotype collection O80:H26                                |                     |      | *    |      | ***  | ***  | ***  |
| Serotype collection O78:H4                                 |                     | ***  | ***  | ***  | ***  | ***  | ***  |
| <i>stx1a</i> AE-STE $C$ O80:H2 (SES5320 pS88--)            |                     |      |      |      |      | ***  | ***  |
| <i>stx1a</i> AE-STE $C$ O80:H2 (SES5363 pS88++)            |                     |      |      |      |      | ***  | ***  |
| <i>stx1a</i> AE-STE $C$ O80:H2 (EH2282 pS88++)             |                     |      |      | *    |      | ***  | ***  |
| <i>stx2d</i> AE-STE $C$ O80:H2 (EH3160 pS88++)             |                     |      | **   | *    | **   | ***  | ***  |
| <i>stx2d</i> AE-STE $C$ O80:H2 (EH3307/SES2959 pS88--)     |                     | *    |      | *    | ***  | ***  | ***  |
| <i>stx2d</i> AE-STE $C$ O80:H2 (EH3320/SES3090 pS88++)     |                     |      |      |      | ***  | ***  | ***  |
| EPEC O80:H2 (EH3308/SES2973 pS88--)                        |                     |      |      |      |      | ***  | ***  |
| EPEC O80:H2 (EH3322/SES3122 pS88++)                        |                     |      | **   | *    | **   | ***  | ***  |
| Laboratory K12 DH10B                                       |                     |      |      |      |      |      |      |
| Laboratory K12 DH10B pS88 plasmid transconjugant (<EH2282) |                     |      |      |      |      | *    | **   |
| Laboratory K12 DH10B STX2d phage transductant (<EH3160)    |                     |      | *    |      | **   | ***  | ***  |
| O80:H6 (SES6039)                                           |                     |      |      |      | *    | ***  | ***  |
| O80:H45 (SES5725)                                          |                     |      |      |      |      | ***  | ***  |
| O80:H45 (SES6156)                                          |                     |      |      |      | *    | ***  | ***  |

CFU = Colony Forming Units. \* p-value statistically significant at the threshold 0.05; \*\* p-value statistically significant at the threshold 0.01; \*\*\* p-value statistically significant at the threshold 0.001

**Table S2.** Interpretation of Hazard ratios (HR) and confidence intervals 95% (HR-95%) in the comparison of the log<sub>6</sub> and log<sub>5</sub> concentrations of *E. coli* O80:H2 strains tested in *G. mellonella* larvae according to the pathotype (*stx1a* AE-STECC, *stx2d* AE-STECC, EPEC) and to the detection (++) or not (--) of the pS88 plasmid-located *etsC* and *iucC* genes. HR: Hazard ratio; HR-95%: HR confidence interval 95%; \* p-value statistically significant at the threshold 0.05; \*\* p-value statistically significant at the threshold 0.01

#### Log<sub>6</sub> concentration

| <i>E. coli</i> O80:H2 strains<br>(reference vs test strains) <sup>1</sup> | HR   | HR-95%          | Interpretation                                                                   |
|---------------------------------------------------------------------------|------|-----------------|----------------------------------------------------------------------------------|
| <i>stx1a</i> vs <i>stx2d</i> AE-STECC                                     | 1.29 | 0.96-1.73       | x                                                                                |
| <i>stx1a</i> AE-STECC vs EPEC                                             | 0.80 | 0.57-1.13       | x                                                                                |
| <i>stx2d</i> AE-STECC vs EPEC                                             | 0.62 | 0.44-0.88<br>** | 0.62 more chance to die with EPEC than with <i>stx2d</i> AE-STECC O80:H2 strains |
| <i>stx1a</i> AE-STECC pS88-- vs pS88++ <sup>2</sup>                       | 1.36 | 0.87-2.11       | x                                                                                |
| <i>stx2d</i> AE-STECC pS88-- vs pS88++                                    | 1.21 | 0.78-1.88       | x                                                                                |
| EPEC pS88-- vs pS88++                                                     | 1.88 | 1.09-3.23<br>*  | 1.88 more chance to die with pS88++ than pS88—EPEC O80:H2 strains                |

#### Log<sub>5</sub> concentration

| <i>E. coli</i> O80:H2 strains<br>(reference vs test strains) <sup>1</sup> | HR   | HR-95%          | Interpretation                                                                      |
|---------------------------------------------------------------------------|------|-----------------|-------------------------------------------------------------------------------------|
| <i>stx1a</i> vs <i>stx2d</i> AE-STECC                                     | 1.60 | 1.17-2.19<br>** | 1.60 more chance to die with <i>stx2d</i> than <i>stx1a</i> AE-STECC O80:H2 strains |
| <i>stx1a</i> AE-STECC vs EPEC                                             | 0.92 | 0.64-1.33       | x                                                                                   |
| <i>stx2d</i> AE-STECC vs EPEC                                             | 0.58 | 0.40-0.83<br>** | 0.58 more chance to die with EPEC than with <i>stx2d</i> AE-STECC O80:H2 strains    |
| <i>stx1a</i> AE-STECC pS88-- vs pS88++ <sup>2</sup>                       | 0.91 | 0.57-1.47       | x                                                                                   |
| <i>stx2d</i> AE-STECC pS88-- vs pS88++                                    | 0.93 | 0.59-1.47       | x                                                                                   |
| EPEC pS88-- vs pS88++                                                     | 1.50 | 0.85-2.64       | x                                                                                   |

<sup>1</sup> three *stx1a* AE-STECC (two pS88++ and one pS88), three *stx2d* AE-STECC (two pS88++ and one pS88) and two EPEC (one pS88++ and one pS88--) O80:H2 strains. <sup>2</sup> pS88--: *etsC* and *iucC* genes not detected; pS88++: *etsC* and *iucC* genes detected.

**Table S3.** Interpretation of Hazard ratios (HR) and confidence intervals 95% (HR-95%) in the comparison of the log6 and log5 concentrations of laboratory *E. coli* K12 DH10B, *E. coli* O80:H2, pS88 plasmid DH10B transconjugant and STX2d phage DH10B transductant strains tested in *G. mellonella* larvae. HR: Hazard ratio; HR-95%: HR confidence interval 95%; \* p-value statistically significant at the threshold 0.05; \*\* p-value statistically significant at the threshold 0.01; \*\*\* p-value statistically significant at the threshold 0.001

#### Log6 concentration

| <i>E. coli</i> strains<br>(reference vs test strains)        | HR    | HR-95%              | Interpretation                                                   |
|--------------------------------------------------------------|-------|---------------------|------------------------------------------------------------------|
| DH10B vs <i>stx1a</i> AE-STECC (EH2282 pS88++) <sup>1</sup>  | 44.29 | 12.78-153.50<br>*** | 44.29 more chance to die with EH2282 than DH10B strains          |
| DH10B vs DH10B <pS88++>                                      | 3.41  | 0.92-12.60          | x                                                                |
| DH10B <pS88++> vs <i>stx1a</i> AE-STECC (EH2282 pS88++)      | 12.99 | 5.74-29.37<br>***   | 12.99 more chance to die with EH2282 than DH10B <pS88++> strains |
| DH10B vs <i>stx2d</i> AE-STECC (EH3160 pS88--) <sup>1</sup>  | 81.48 | 17.31-383.60<br>*** | 81.48 more “chance” to die with EH3160 than DH10B strains        |
| DH10B vs DH10B <STX2d>                                       | 79.93 | 16.73-353.80<br>*** | 79.93 more chance to die with DH10B <STX2d> than DH10B strains   |
| DH10B <STX2d phage> vs <i>stx2d</i> AE-STECC (EH3160 pS88--) | 1.06  | 0.64-1.76           | x                                                                |

#### Log5 concentration

| <i>E. coli</i> strains<br>(reference vs test strains)       | HR    | HR-95%              | Interpretation                                                   |
|-------------------------------------------------------------|-------|---------------------|------------------------------------------------------------------|
| DH10B vs <i>stx1a</i> AE-STECC (EH2282 pS88++) <sup>1</sup> | 78.71 | 10.57-586.30<br>*** | 78.71 more chance to die with EH2282 than DH10B strains          |
| DH10B vs DH10B <pS88++>                                     | 7.76  | 0.95-63.07          | x                                                                |
| DH10B <pS88++> vs <i>stx1a</i> AE-STECC (EH2282 pS88++)     | 10.15 | 4.32-23.82<br>***   | 10.15 more chance to die with EH2282 than DH10B <pS88++> strains |
| DH10B vs <i>stx2d</i> AE-STECC (EH3160 pS88--) <sup>1</sup> | 55.89 | 7.54-414.00<br>***  | 55.89 more chance to die with EH3160 than DH10B strains          |

|                                                                 |       |                    |                                                                      |
|-----------------------------------------------------------------|-------|--------------------|----------------------------------------------------------------------|
| DH10B vs DH10B <STX2d>                                          | 65.05 | 8.75-483.40<br>*** | 65.05 more chance to die<br>with DH10B <STX2d><br>than DH10B strains |
| DH10B <STX2d phage> vs <i>stx2d</i> AE-STECS<br>(EH3160 pS88--) | 0.86  | 0.50-1.49          | x                                                                    |

<sup>1</sup> pS88--: *etsC* and *iucC* genes not detected; pS88++: *etsC* and *iucC* genes detected.

**Table S4.** Interpretation of Hazard ratios (HR) and confidence intervals 95% (HR-95%) in the comparison of the log<sub>6</sub> and log<sub>5</sub> concentrations of *E. coli* O80:H2 and O80:non-H2 strains tested in *G. mellonella* larvae. HR: Hazard ratio; HR-95%: HR confidence interval 95%; \* p-value statistically significant at the threshold 0.05; \*\* p-value statistically significant at the threshold 0.01.

#### Log<sub>6</sub> concentration

| <i>E. coli</i> O80 strains<br>(reference vs test strains) <sup>1</sup> | HR   | HR-95%          | Interpretation                                                                   |
|------------------------------------------------------------------------|------|-----------------|----------------------------------------------------------------------------------|
| <i>stx1a</i> AE-STECS O80:H2 vs O80:H6                                 | 0.63 | 0.41-0.98<br>*  | 0.63 more chance to die<br>with O80:H6 than with<br><i>stx1a</i> O80:H2 strains  |
| <i>stx2d</i> AE-STECS O80:H2 vs O80:H6                                 | 0.48 | 0.31-0.76<br>** | 0.48 more chance to die<br>with O80:H6 than with<br><i>stx2d</i> O80:H2 strains  |
| EPEC O80:H2 vs O80:H6                                                  | 0.83 | 0.52-1.30       | x                                                                                |
| <i>stx1a</i> AE-STECS O80:H2 vs O80:H26                                | 1.26 | 0.83-1.91       | x                                                                                |
| <i>stx2d</i> AE-STECS O80:H2 vs O80:H26                                | 0.96 | 0.63-1.45       | x                                                                                |
| EPEC O80:H2 vs O80:H26                                                 | 1.45 | 0.92-2.27       | x                                                                                |
| <i>stx1a</i> AE-STECS O80:H2 vs O80:H45                                | 0.87 | 0.62-1.21       | x                                                                                |
| <i>stx2d</i> AE-STECS O80:H2 vs O80:H45                                | 0.69 | 0.49-0.97<br>*  | 0.69 more chance to die<br>with O80:H45 than with<br><i>stx2d</i> O80:H2 strains |
| EPEC O80:H2 vs O80:H45                                                 | 1.08 | 0.75-1.57       | x                                                                                |
| O80:H6 vs O80:H26                                                      | 1.86 | 1.11-3.12<br>*  | 1.86 more chance to die<br>with O80:H26 than<br>O80:H6 strains                   |
| O80:H6 vs O80:H45                                                      | 1.33 | 0.85-2.09       | x                                                                                |
| O80:H26 vs O80:H45                                                     | 0.72 | 0.46-1.12       | x                                                                                |

#### Log<sub>5</sub> concentration

| <i>E. coli</i> O80 strains<br>(reference vs test strains) <sup>1</sup> | HR | HR-95% | Interpretation |
|------------------------------------------------------------------------|----|--------|----------------|
|------------------------------------------------------------------------|----|--------|----------------|

|                                         |      |           |                                                                                 |
|-----------------------------------------|------|-----------|---------------------------------------------------------------------------------|
| <i>stx1a</i> AE-STECS O80:H2 vs O80:H6  | 0.94 | 0.60-1.48 | x                                                                               |
| <i>stx2d</i> AE-STECS O80:H2 vs O80:H6  | 0.59 | 0.38-0.93 | 0.59 more chance to die<br>with O80:H6 than with<br><i>stx2d</i> O80:H2 strains |
|                                         |      | *         |                                                                                 |
| EPEC O80:H2 vs O80:H6                   | 1.04 | 0.64-1.69 | x                                                                               |
| <i>stx1a</i> AE-STECS O80:H2 vs O80:H26 | 1.13 | 0.71-1.80 | x                                                                               |
| <i>stx2d</i> AE-STECS O80:H2 vs O80:H26 | 0.74 | 0.47-1.18 | x                                                                               |
| EPEC O80:H2 vs O80:H26                  | 1.18 | 0.71-1.95 | x                                                                               |
| <i>stx1a</i> AE-STECS O80:H2 vs O80:H45 | 1.20 | 0.84-1.70 | x                                                                               |
| <i>stx2d</i> AE-STECS O80:H2 vs O80:H45 | 0.76 | 0.54-1.07 | x                                                                               |
| EPEC O80:H2 vs O80:H45                  | 1.30 | 0.88-1.92 | x                                                                               |
| O80:H6 vs O80:H26                       | 1.16 | 0.66-2.04 | x                                                                               |
| O80:H6 vs O80:H45                       | 1.26 | 0.78-2.02 | x                                                                               |
| O80:H26 vs O80:H45                      | 1.09 | 0.67-1.77 | x                                                                               |

<sup>1</sup> three *stx1a* AE-STECS, three *stx2d* AE-STECS and two EPEC O80:H2 strains; one *E. coli* O80:H6; one *E. coli* O80:H26; two *E. coli* O80:H45
